# Supplementary material for: Analytical Assessment of Bioelements in Various Types of Black Teas from Different Geographical Origins in View of Chemometric Approach
Source: MDPI journal article supplement (doi:10.3390/molecules26196017), 2021-10-04
Supplement: s1 [file s1]

Supplementary file.

## **Analytical assessment of bioelements in various types of black teas from different geographical origins in view of chemometric approach**

**Wojciech Koch <sup>1\*</sup>, Wirginia Kukula-Koch <sup>2</sup>, Marcin Czop <sup>3</sup>, Tomasz Baj <sup>2</sup>, Janusz Kocki <sup>3</sup>, Piotr Bawiec <sup>1</sup>, Roser Olives Casasnovas <sup>1,4</sup>, Anna Głowniak-Lipa <sup>5</sup> and Kazimierz Głowniak <sup>5</sup>**

<sup>1</sup> Chair and Department of Food and Nutrition, Medical University of Lublin, 4a Chodźki Str., 20-093 Lublin, Poland Piotr.bawiec@wp.pl (P.B.)

<sup>2</sup> Chair and Department of Pharmacognosy, Medical University of Lublin, 1 Chodźki Str., 20-093 Lublin, Poland; virginia.kukula@gmail.com (W.K.-K.)

<sup>3</sup> Department of Clinical Genetics, Medical University of Lublin, 11 Radziwiłłowska Str., 20-093 Lublin, Poland; [marcin.czop@umlub.pl](mailto:marcin.czop@umlub.pl) (M.C.); [janusz.kocki@umlub.pl](mailto:janusz.kocki@umlub.pl) (J.K.)

<sup>4</sup> University of Barcelona, Spain; roserolives@hotmail.com

<sup>5</sup> Department of Cosmetology, University of Information Technology and Management in Rzeszów, Kielnarowa 386a, 36-020 Tyczyn, Poland; [aglowniak@wsiz.edu.pl](mailto:aglowniak@wsiz.edu.pl) (A.G.L.); [kglowniak@pharmacognosy.org](mailto:kglowniak@pharmacognosy.org) (K.G.)

\* Correspondence: [kochw@interia.pl](mailto:kochw@interia.pl); Tel.: +48-81-448-7143

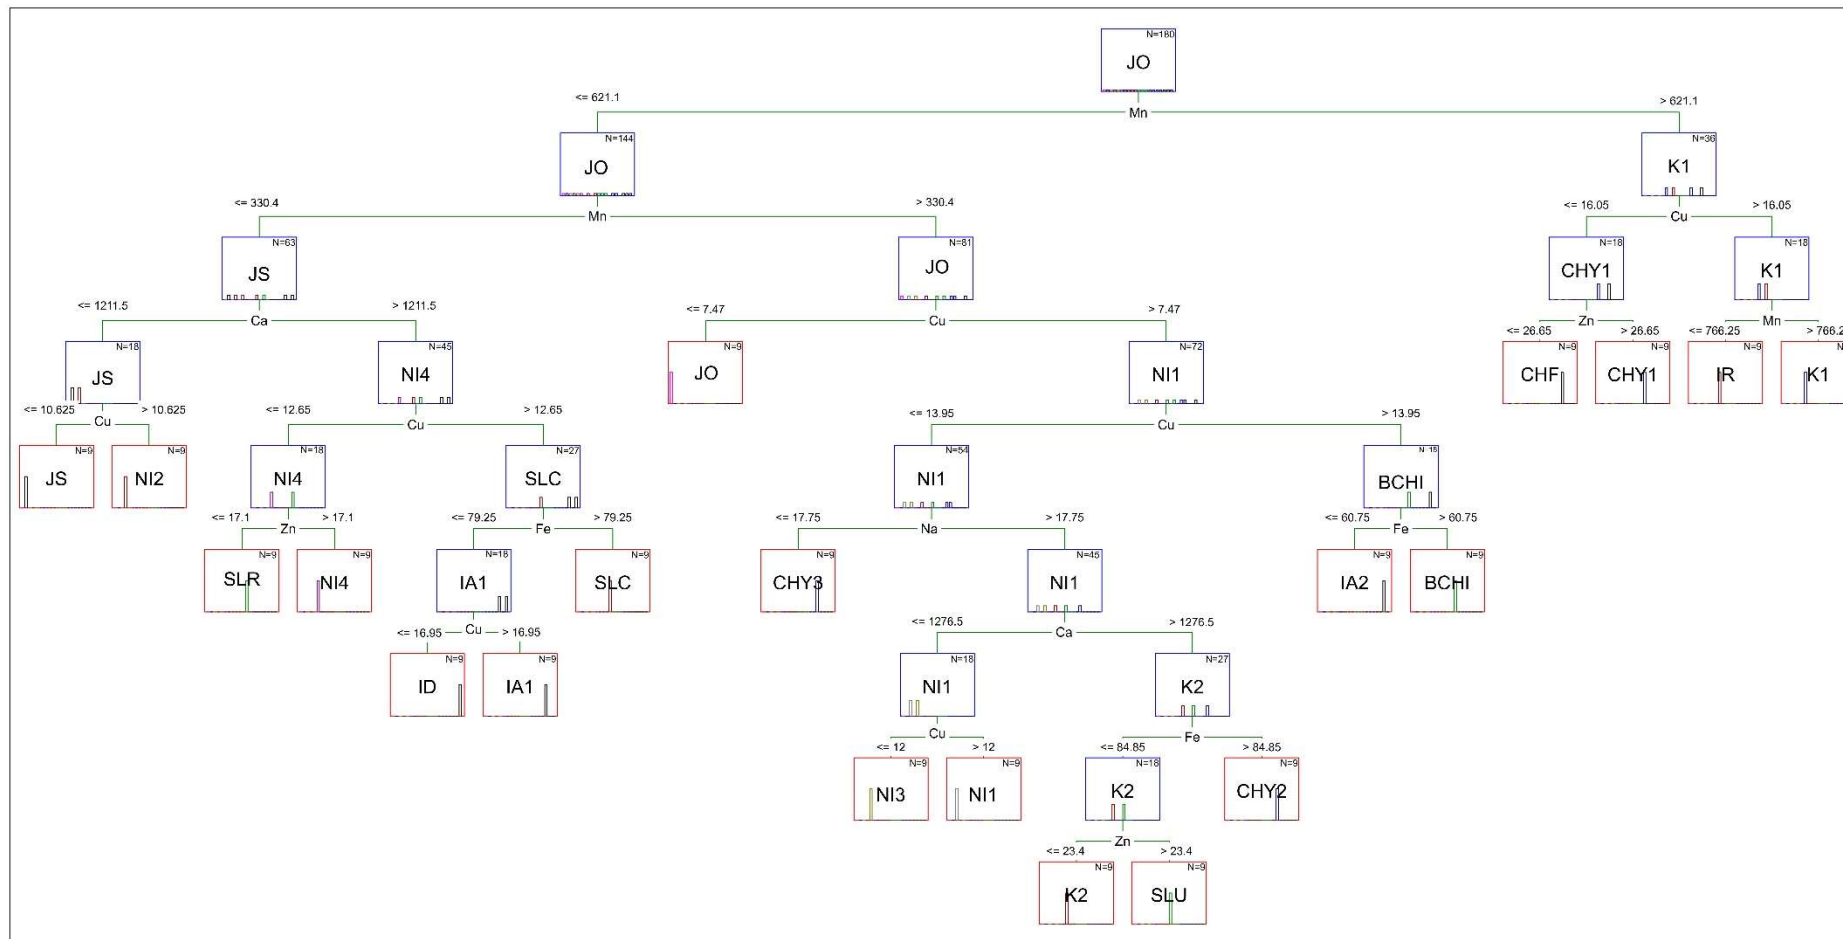

**Figure S1.** Classification tree for samples of tea (full version).
